# Supplementary material for: Five new pseudocryptic land planarian species of Cratera (Platyhelminthes: Tricladida) unveiled through integrative taxonomy
Source: PeerJ journal article supplement (doi:10.7717/peerj.9726), 2020-09-04
Supplement: FigureS1_rev.pdf [file FigureS1_rev.pdf]

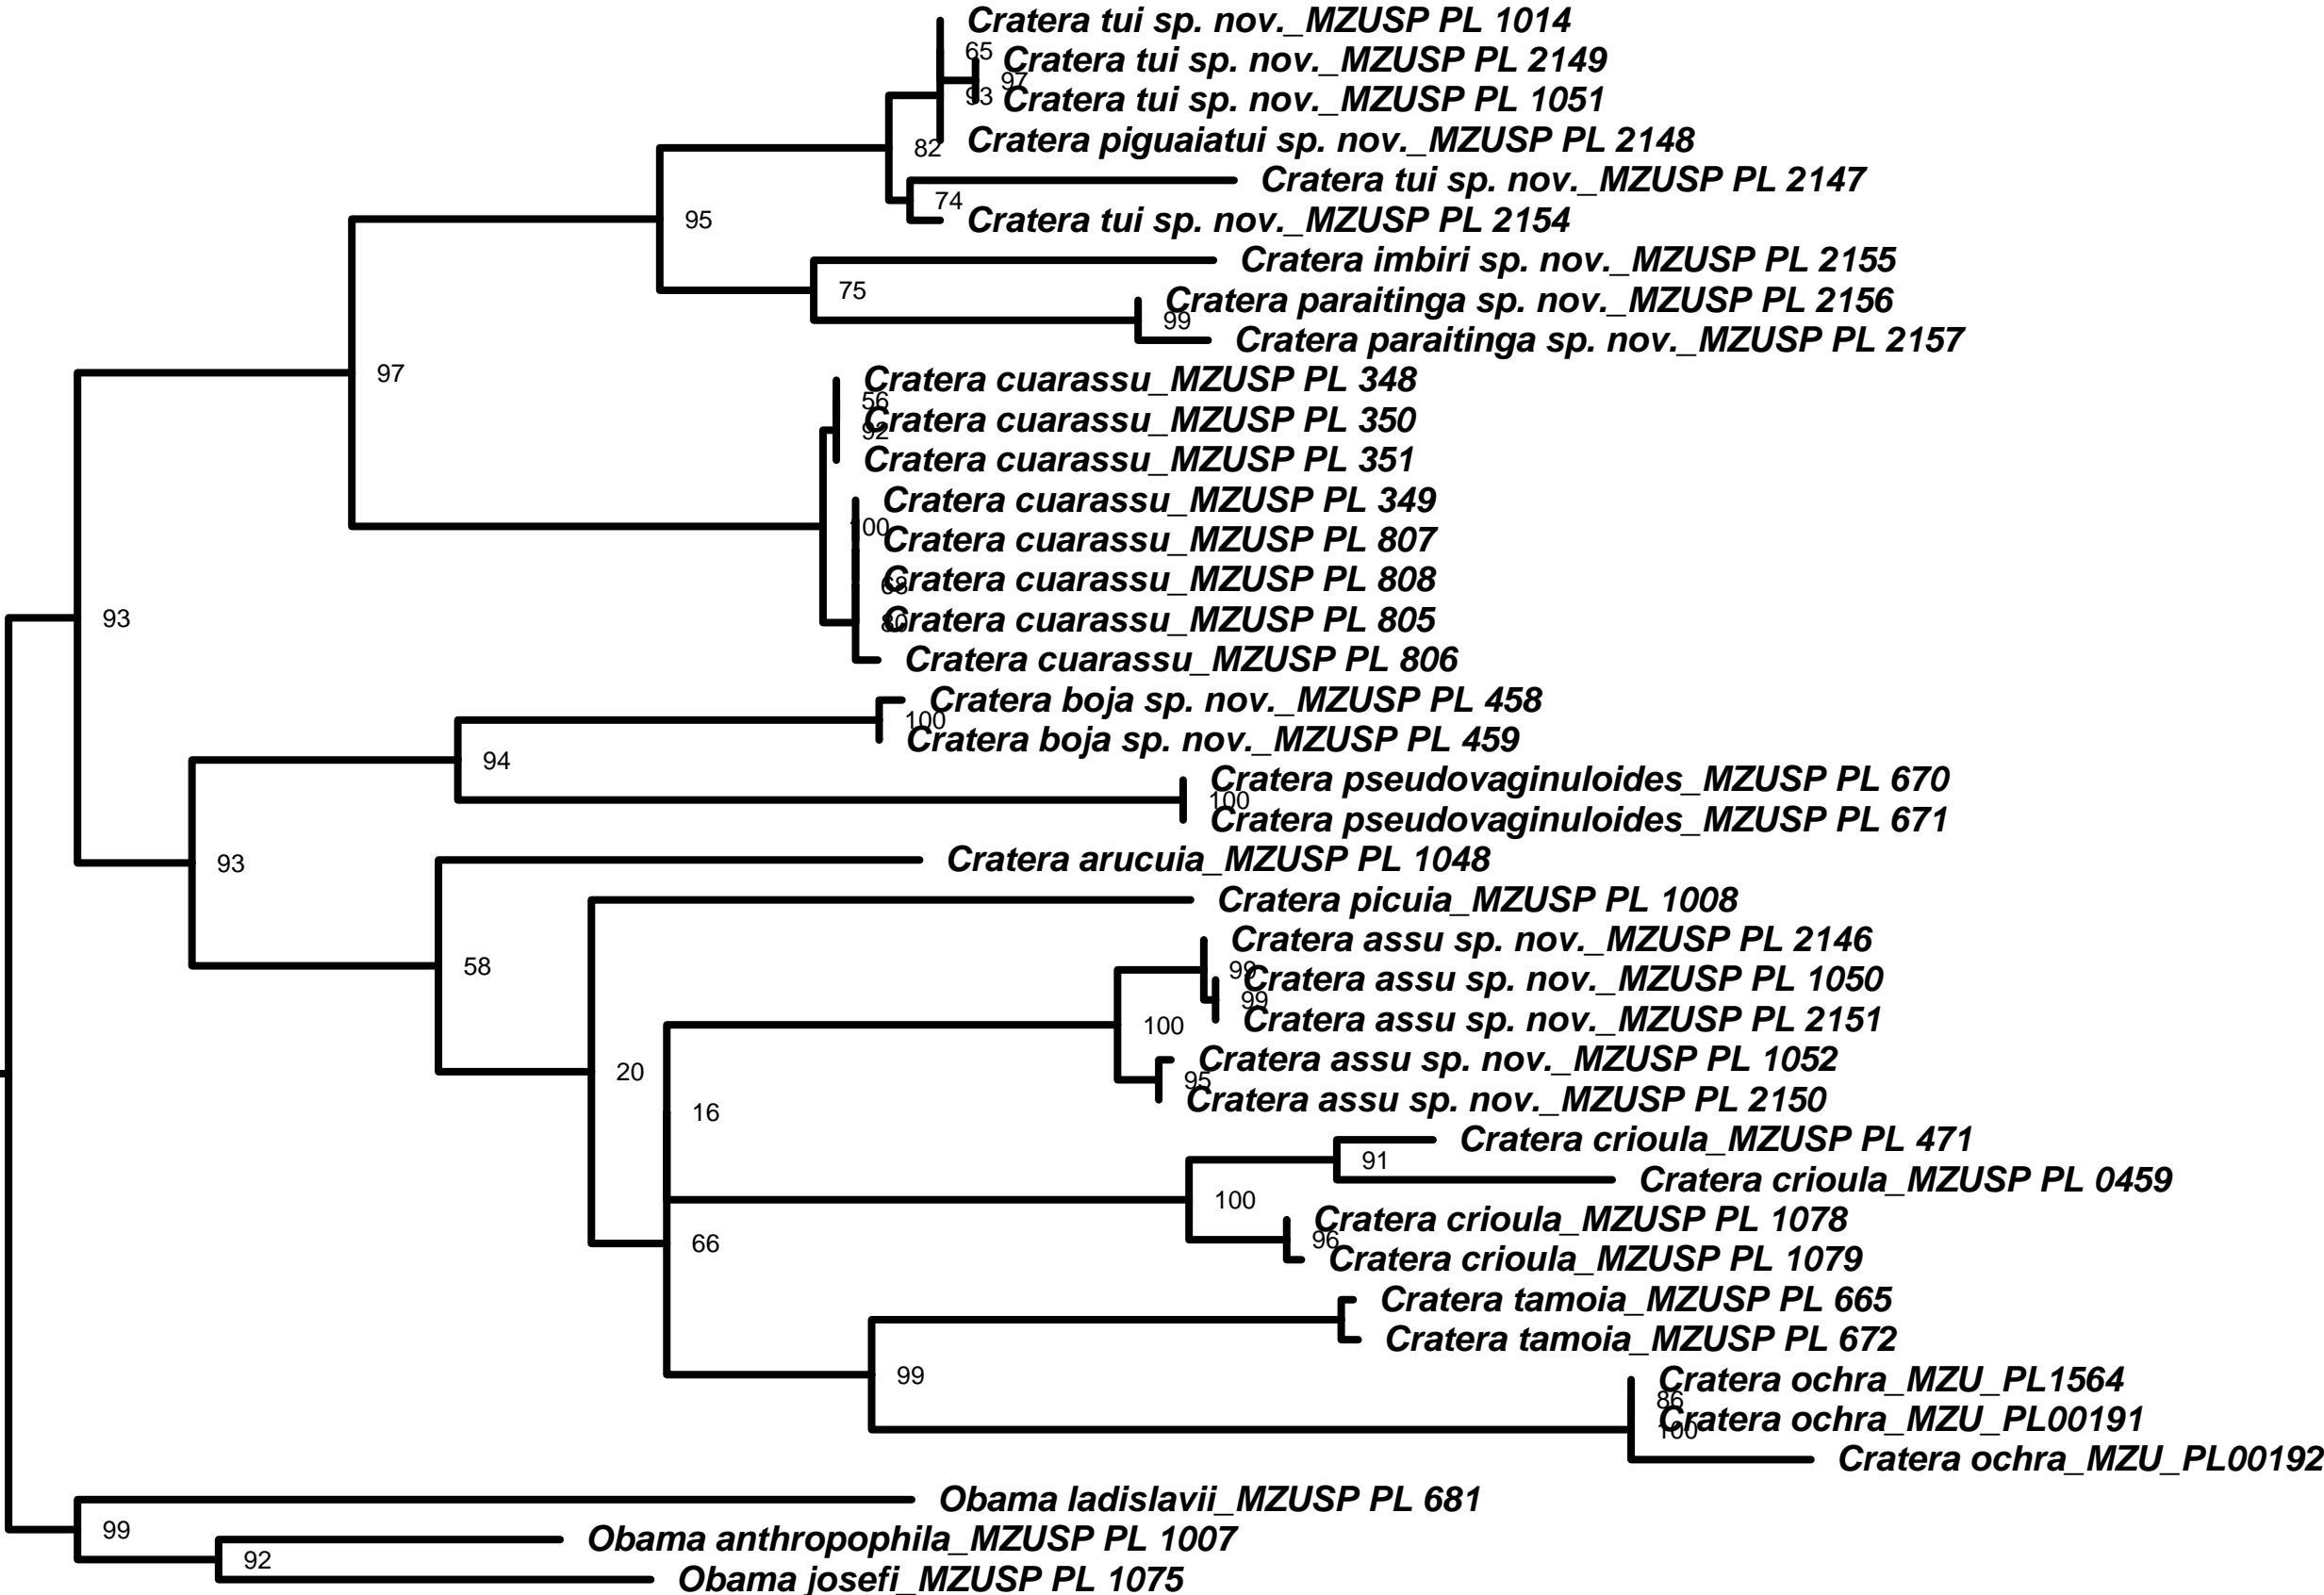

0.02
