# Supplementary material for: Five new pseudocryptic land planarian species of Cratera (Platyhelminthes: Tricladida) unveiled through integrative taxonomy
Source: PeerJ journal article supplement (doi:10.7717/peerj.9726), 2020-09-04
Supplement: Table_S1_rev.pdf [file Table_S1_rev.pdf]

**Table S1.** Primers used in this study.

| Genomic region   | Primer name | Sequence                | Source                              |
|------------------|-------------|-------------------------|-------------------------------------|
| TNUC813          | TNUCF6      | CTTTGGGATACTGCTGG       | Present study                       |
|                  | TNUCR6      | GCAAAACAAAACCAATCC      | Present study                       |
| COI              | BarS        | GTTATGCCTGTAATGATTG     | Álvarez-Presas <i>et al.</i> (2011) |
|                  | COIR        | CCWGTYARMCCHCCWAYAGTAAA | Lázaro <i>et al.</i> (2009)         |
|                  | COIF        | CCNGGDTTGGDATDRTWTCWCA  | Lázaro <i>et al.</i> (2009)         |
| 18S rDNA type II | 18S1F       | TACCTGGTTGATCCTGCCAGTAG | Giribet <i>et al.</i> (1996)        |
|                  | 18S7R       | GCATCACAGACCTGTTATTGC   | Giribet <i>et al.</i> (1996)        |
|                  | 18S4F       | CCAGCAGCCGCGCTAATTC     | Giribet <i>et al.</i> (1996)        |
|                  | 18S9R       | GATCCTTCCGCAGGTTACCTAC  | Giribet <i>et al.</i> (1996)        |
| 28S rDNA         | 28S1F       | TATCAGTAAGCGGAGGAAAAG   | Álvarez-Presas <i>et al.</i> (2008) |
|                  | 28S6R       | GGAACCCCTTCTCCACTTCAGT  | Álvarez-Presas <i>et al.</i> (2008) |
| EF-1a            | EFPlatF     | GATTGCYCCWGGYCATCG      | Carbayo <i>et al.</i> 2013          |
|                  | EFPlatR     | GCRATWGAYTCGTGRTGC      | Carbayo <i>et al.</i> 2013          |
| Nd4toCox1        | Kete        | CATGGTTTTTGTCTTC        | Solà <i>et al.</i> 2015             |
|                  | Peten       | CCAAAACCACCAATC         | Solà <i>et al.</i> 2015             |

## References:

- Álvarez-Presas M, Baguñà J, Riutort M. 2008. Molecular phylogeny of land and freshwater planarians (Tricladida, Platyhelminthes): from freshwater to land and back. *Molecular Phylogenetics and Evolution* 47: 555–568. <https://doi.org/10.1016/j.ympev.2008.01.032>
- Álvarez-Presas M, Carbayo F, Rozas J, Riutort M. 2011. Land planarians (Platyhelminthes) as a model organism for fine-scale phylogeographic studies: understanding patterns of biodiversity in the Brazilian Atlantic Forest hotspot. *Journal of Evolutionary Biology* 24: 887–896. <https://doi.org/10.1111/j.1420-9101.2010.02220.x>
- Carbayo F, Álvarez-Presas M, Olivares CT, Marques FPL, Froehlich EM, Riutort M. 2013. Molecular phylogeny of Geoplaninae (Platyhelminthes) challenges current classification: proposal of taxonomic actions. *Zoologica Scripta* 42: 508–528. <https://doi.org/10.1111/zsc.12019>
- Giribet, G, Carranza, S, Baguñà, J, Riutort, M, Ribera, C. 1996. First molecular evidence for the existence of a Tardigrada + Arthropoda clade. *Molecular Biology and Evolution*, 13(1), 76–84. <https://doi.org/10.1093/oxfordjournals.molbev.a025573>
- Lázaro EM, Sluys R, Pala M, Stocchino GA, Baguñà J, Riutort M. 2009. Molecular barcoding and phylogeography of sexual and asexual freshwater planarians of the genus *Dugesia* in the Western Mediterranean (Platyhelminthes, Tricladida, Dugesidae). *Molecular Phylogenetics and Evolution* 52: 835–845. <https://doi.org/10.1016/j.ympev.2009.04.022>
- Solà, E., Álvarez-Presas, M, Frias, C, Littlewood, T, Rozas, J, Riutort, M. 2015. Evolutionary analysis of mitogenomes from parasitic and free-living flatworms. *PLoS ONE*, 10(3), e0120081. <https://doi.org/10.1371/journal.pone.0120081>
